# Supplementary material
Source: PubMed Central journal article supplement (PMC4249049)
Supplement: AEM.01838-14_zam999105764so1.pdf [file AEM.01838-14_zam999105764so1.pdf]

## Supplementary Information

van Teeseling MCF, Pol A, Harhangi HR, van der Zwart S, Jetten MSM, Op den Camp HJM, van Niftrik L.

Isolation and characterization of three novel mesophilic verrucomicrobial methanotrophs from volcanic soil.

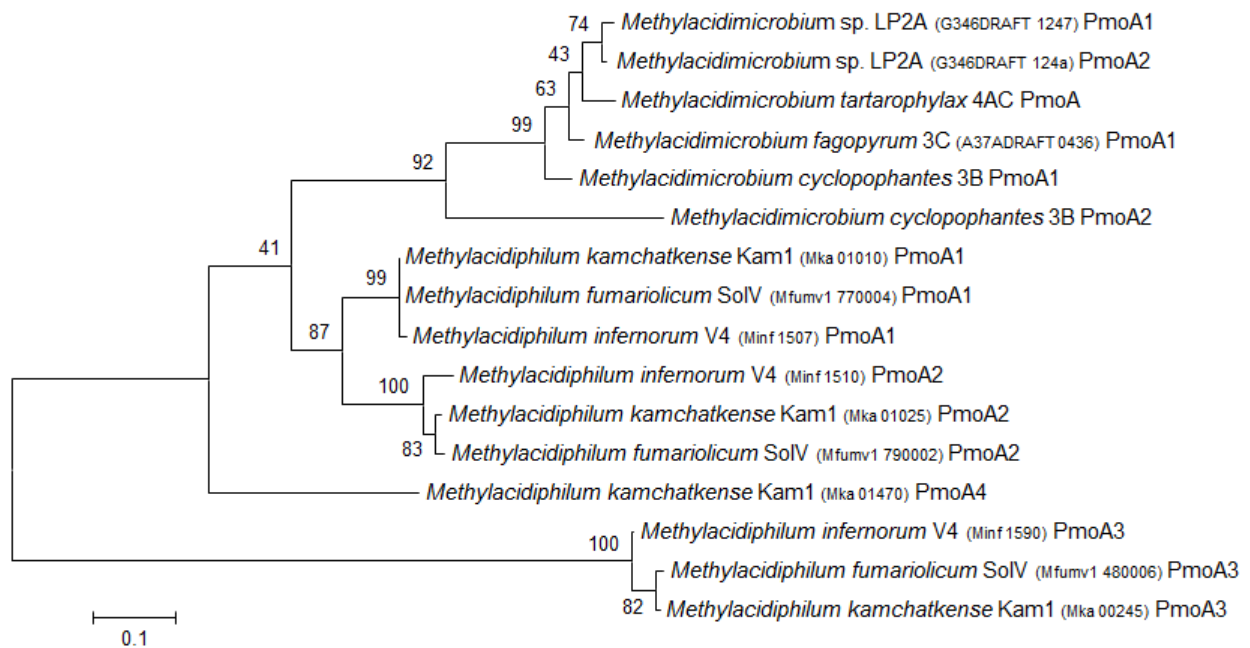

**FIG S1** PmoA gene-based phylogenetic tree of methanotrophic Verrucomicrobia shows that the mesophilic strains cluster together separately from the thermophilic species. The evolutionary history was inferred by using the Maximum Likelihood method based on the Dayhoff matrix based model. The tree with the highest log likelihood (-2842.1305) is shown. Initial tree(s) for the heuristic search were obtained automatically by applying Neighbor-Join and BioNJ algorithms to a matrix of pairwise distances estimated using a JTT model, and then selecting the topology with superior log likelihood value. The tree is drawn to scale, with branch lengths measured in the number of substitutions per site. The analysis involved 16 amino acid sequences. All positions with less than 95% site coverage were eliminated. There were a total of 243 positions in the final dataset. Evolutionary analyses were conducted in MEGA5.

**TABLE S1** Comparison based on presence/absence of key genes in methylotrophy, nitrogen metabolism and storage of polyphosphate and glycogen between the three newly described mesophilic Verrucomicrobia, strain LP2A and thermophilic species *Methylacidiphilum fumariolicum* SolV and *Methylacidiphilum infernorum* V4. Positive detection of genes was based on annotations by JGI (3C) and RAST (3B, 4AC) and on BLAST searches. In the case of strains LP2A and V4 the gene detection was noted as described previously (1). For strain SolV, the analysis was based on the previously published genome (2). + = present; ND = not detected in genome. Numbers in parentheses indicate multiple copies of a gene. \* = 2nd pmoC of strain 3C is partial; \*\* = the NorC gene in strain 3B is fragmented.

| Gene name                 | Product                                                                       | 3B    | 3C     | 4AC   | LP2A  | SolV  | V4    |
|---------------------------|-------------------------------------------------------------------------------|-------|--------|-------|-------|-------|-------|
| <b>Methane oxidation</b>  |                                                                               |       |        |       |       |       |       |
| pmoC                      | particulate methane monooxygenase (pMMO), subunit gamma                       | +     | + (2)* | +     | + (3) | + (3) | + (4) |
| pmoA                      | particulate methane monooxygenase (pMMO), subunit beta                        | + (2) | +      | + (2) | + (2) | + (3) | + (3) |
| pmoB                      | particulate methane monooxygenase (pMMO), subunit alpha                       | +     | + (2)  | +     | + (2) | + (3) | + (3) |
| mmoX                      | soluble methane monooxygenase (sMMO), subunit alpha                           | ND    | ND     | ND    | ND    | ND    | ND    |
| mmoY                      | soluble methane monooxygenase (sMMO), subunit beta                            | ND    | ND     | ND    | ND    | ND    | ND    |
| mmoZ                      | soluble methane monooxygenase (sMMO), subunit gamma                           | ND    | ND     | ND    | ND    | ND    | ND    |
| mmoB                      | soluble methane monooxygenase (sMMO), regulatory component                    | ND    | ND     | ND    | ND    | ND    | ND    |
| <b>Methanol oxidation</b> |                                                                               |       |        |       |       |       |       |
| xoxF                      | PQQ-dependent methanol dehydrogenase                                          | + (2) | + (2)  | + (2) | + (3) | +     | +     |
| xoxJ                      | Periplasmic binding protein involved in methanol oxidation                    | +     | +      | +     | +     | +     | +     |
| xoxG                      | Cytochrome c family protein, electron acceptor for PQQ-methanol dehydrogenase | +     | +      | +     | +     | +     | +     |
| pqqA                      | coenzyme PQQ biosynthesis                                                     | +     | +      | ND    | +     | +     | +     |
| pqqB                      | coenzyme PQQ biosynthesis                                                     | +     | +      | +     | +     | +     | +     |
| pqqC                      | coenzyme PQQ biosynthesis                                                     | +     | +      | +     | +     | +     | +     |
| pqqD                      | coenzyme PQQ biosynthesis                                                     | +     | + (3)  | +     | +     | +     | +     |
| pqqE                      | coenzyme PQQ biosynthesis                                                     | +     | +      | +     | +     | +     | +     |
| pqqF                      | coenzyme PQQ biosynthesis                                                     | ND    | ND     | ND    | ND    | +     | ND    |

|                                                    |                                                         |       |       |       |       |       |       |
|----------------------------------------------------|---------------------------------------------------------|-------|-------|-------|-------|-------|-------|
| pqqG                                               | coenzyme PQQ biosynthesis                               | ND    | ND    | ND    | ND    | ND    | ND    |
| <b>Formate oxidation</b>                           |                                                         |       |       |       |       |       |       |
| fdsD                                               | NAD-dependent formate dehydrogenase subunit delta       | +     | +     | +     | +     | +     | +     |
| fdsA                                               | NAD-dependent formate dehydrogenase subunit alpha       | +     | +     | +     | +     | +     | +     |
| fdsB                                               | NAD-dependent formate dehydrogenase subunit beta        | +     | +     | +     | +     | +     | +     |
| fdsG                                               | NAD-dependent formate dehydrogenase subunit gamma       | +     | +     | +     | +     | +     | +     |
| hyfB                                               | Formate hydrogenlyase subunit 3                         | + (2) | + (2) | + (2) | +     | +     | +     |
| hyfC                                               | Formate hydrogenlyase subunit 4                         | +     | +     | +     | +     | +     | +     |
| hyfE                                               | Formate hydrogenlyase membrane component                | +     | +     | +     | +     | +     | +     |
| hycG                                               | Formate hydrogenlyase subunit 7                         | +     | +     | +     | +     | +     | +     |
| fdhD                                               | Formate dehydrogenase chain D                           | +     | +     | +     | +     | +     | +     |
| <b>Serine cycle (key enzyme)</b>                   |                                                         |       |       |       |       |       |       |
| Hpr                                                | hydroxypyruvate reductase                               | ND    | ND    | ND    | ND    | ND    | ND    |
| Mcl                                                | malyl-CoA lyase                                         | ND    | ND    | ND    | ND    | ND    | ND    |
| <b>Ribulose monophosphate pathway (key enzyme)</b> |                                                         |       |       |       |       |       |       |
| hxlA                                               | 3-hexulose-6-phosphate synthase                         | ND    | ND    | ND    | ND    | ND    | ND    |
| hslB                                               | 6-phospho-3-hexuloisomerase                             | ND    | ND    | ND    | ND    | ND    | ND    |
| <b>Calvin-Benson-Bassham Cycle</b>                 |                                                         |       |       |       |       |       |       |
| cbbS                                               | Ribulose 1,5 biphosphate carboxylase, small subunit     | +     | +     | +     | +     | +     | +     |
| cbbL                                               | Ribulose 1,5 biphosphate carboxylase, large subunit     | +     | + (2) | +     | +     | +     | +     |
| Pgk                                                | 3-phosphoglycerate kinase                               | +     | +     | +     | +     | +     | +     |
| cbbG/gapA                                          | Glyceraldehyde-3-phosphate dehydrogenase                | +     | +     | +     | +     | +     | +     |
| tpipA                                              | Triosephosphate isomerase                               | +     | +     | +     | +     | +     | +     |
| fbaA                                               | Fructose biphosphate aldolase Class II                  | +     | +     | +     | +     | +     | +     |
| fbaB                                               | Fructose-1,6-phosphate aldolase Class I (archaeal type) | +     | +     | +     | +     | +     | +     |
| Fbp                                                | Fructose-1,6-biphosphatase                              | +     | +     | +     | +     | +     | +     |
| cbbT                                               | Transketolase                                           | +     | +     | +     | +     | +     | +     |
| Rpe                                                | Ribulose-5-phosphate-3-epimerase                        | + (2) | + (2) | + (2) | + (2) | + (2) | + (2) |
| xpkA                                               | Phosphoketolase                                         | +     | +     | +     | +     | +     | +     |

|                                |                                                            |      |      |      |      |      |      |
|--------------------------------|------------------------------------------------------------|------|------|------|------|------|------|
| rpiB                           | Ribose 5-phosphate isomerase                               | +    | +    | +    | +    | +    | +    |
| Udk                            | Phosphoribulokinase                                        | +    | +    | +    | +    | +    | +    |
| <b>Nitrogen metabolism</b>     |                                                            |      |      |      |      |      |      |
| haoAB                          | hydroxylamine oxidoreductase                               | ND   | ND   | ND   | ND   | +    | +    |
| nirK                           | nitrite reductase, copper-containing                       | +    | +    | +    | +    | +    | +    |
| nirS                           | cytochrome cd1 nitrite reductase                           | ND   | ND   | ND   | ND   | ND   | ND   |
| cytL                           | cytochrome P460, nitric oxide: hydroxylamine dehydrogenase | ND   | ND   | ND   | ND   | ND   | ND   |
| cytS                           | putative nitric oxide reductase                            | ND   | ND   | ND   | ND   | ND   | ND   |
| norC                           | nitric oxide reductase subunit C                           | +**  | +    | +    | +    | +    | +    |
| norB                           | nitric oxide reductase subunit B                           | ND   | +    | +    | +    | +    | +    |
| <b>Phosphate storage genes</b> |                                                            |      |      |      |      |      |      |
| ppk1                           | polyphosphate kinase                                       | +    | +    | +    | +    | +    | +    |
| ppx                            | Exopolyphosphatase                                         | +(2) | +(2) | +(2) | +(2) | +(2) | +(2) |
| <b>Glycogen genes</b>          |                                                            |      |      |      |      |      |      |
| glgA                           | glycogen synthase                                          | +(2) | +(2) | +(2) | +(2) | +(1) | +(2) |
| gdb                            | glycogen debranching enzyme                                | +    | +    | +    | +    | +    | +    |

**TABLE S2** Dimensions of the three mesophilic verrucomicrobial methanotrophs and *M. fumariolicum* SolV averaged over 100 cells. Standard deviations are given in brackets. The width is measured at the broadest part of the cell. The length/width (L/W) ratio gives an indication of the relative width of the cell; lower values mean relatively broader cells.

|             | <b>Strain 3B</b> | <b>Strain 3C</b> | <b>Strain 4AC</b> | <b><i>M. fumariolicum</i></b> |
|-------------|------------------|------------------|-------------------|-------------------------------|
| Length (µm) | 1.2 (±0.2)       | 1.4 (± 0.3)      | 1.2 (± 0.2)       | 1.5 (± 0.3)                   |
| Width (µm)  | 0.6 (± 0.1)      | 0.9 (± 0.1)      | 0.7 (± 0.1)       | 0.7 (± 0.1)                   |
| Ratio L/W   | 2.0              | 1.6              | 1.7               | 2.1                           |

**TABLE S3** Properties of electron dense particles observed in the four verrucomicrobial methanotrophic strains. The average diameter (standard deviation in brackets) of 24 particles measured in negatively stained cells is quite similar in the four different strains. The amount of electron dense particles per cell (again 24 particles counted) slightly differs. For each strain, the dominant elements in the ED particle as measured by EDX analysis are listed with in brackets the percentage of the 10 analyzed cells that showed this enrichment.

|                                                   | <b>Strain 3B</b>                    | <b>Strain 3C</b>                                                             | <b>Strain 4AC</b>                                    | <b><i>M. fumariolicum</i></b>                                              |
|---------------------------------------------------|-------------------------------------|------------------------------------------------------------------------------|------------------------------------------------------|----------------------------------------------------------------------------|
| Amount of ED particles per cell                   | 0.9                                 | 1.2                                                                          | 0.9                                                  | 1.0                                                                        |
| Average diameter of ED particles (µm)             | 0.12 (±0.04)                        | 0.16 (±0.08)                                                                 | 0.15 (±0.03)                                         | 0.22 (±0.05)                                                               |
| ED particle is enriched in the following elements | -Phosphorus (100%)<br>-Oxygen (80%) | -Phosphorus (100%)<br>-Oxygen (100%)<br>-Magnesium (100%)<br>-Nitrogen (90%) | -Sulfur (100%)<br>-Oxygen (70%)<br>-Phosphorus (20%) | -Oxygen (100%)<br>-Phosphorus (70%)<br>-Magnesium (70%)<br>-Nitrogen (10%) |

## References

1. **Sharp CE, Smirnova AV, Graham JM, Stott MB, Khadka R, Moore TR, Grasby SE, Strack M, Dunfield PF.** 18 April 2014. Distribution and diversity of *Verrucomicrobia* methanotrophs in geothermal and acidic environments. Environ. Microbiol. doi:10.1111/1462-2920.12454.

2. **Khadem AF, Wieczorek AS, Pol A, Vuilleumier S, Harhangi HR, Dunfield PF, Kalyuzhnaya MG, Murrel JC, Francoijs K-J, Stunnenberg HG, Stein LY, DiSpirito AA, Semrau JD, Lajus A, Médigue C, Klotz MG, Jetten MSM, Op den Camp HJM.** 2012. Draft genome sequence of the volcano-inhibiting thermoacidophilic methanotroph *Methylophilum fumariolicum* strain SolV. *J. Bacteriol.* **194**:3729-3730.
